# Supplementary material for: Trans-differentiation of human mesenchymal stem cells generates functional hepatospheres on poly(l-lactic acid)-co-poly(ε-caprolactone)/collagen nanofibrous scaffolds
Source: Royal Society of Chemistry journal article supplement (doi:10.1039/c3tb20241k), 2013-01-01
Supplement: c3tb20241k.pdf [file c3tb20241k.pdf]

**Supplementary Information:**

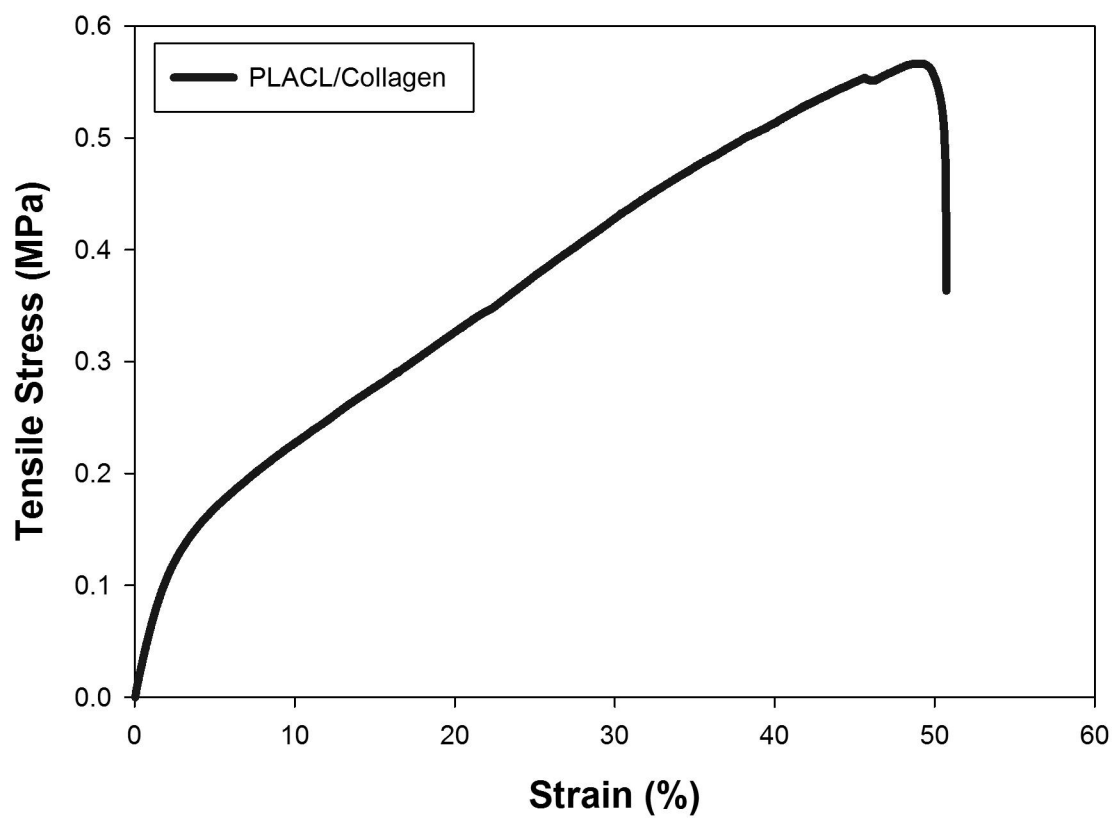

**Figure S1.** Stress-strain curve of PLACL/collagen nanofibrous scaffold.
